# Supplementary material for: Proposed therapy, developed in a Pcdh15-deficient mouse, for progressive loss of vision in human Usher syndrome
Source: eLife. 2021 Nov 9;10:e67361. doi: 10.7554/eLife.67361 (PMC8577840; doi:10.7554/eLife.67361)
Supplement: Source data 1. [file elife-67361-supp1.xlsx]

## Sheet: Fig 1e
	decade of life	degree
	1
	2	90	65	110	110
	3	30	35	40	9	145	140
	4	20	23	100	60	65
	5
	6	15	6	5	22	35
	7

## Sheet: Fig 1f
	decade of life	logMAR BCVA
	1	0.2	0.2
	2	0.1	0.1	0.1	0.1	0.2
	3	0.3	0.2	0.3	0.3	0.5	0.2	0.2	0.5
	4	2.3	0.2	0.4	0.5	0.8
	5
	6	0.4	1.4	1.2	0.7	1.1
	7	2.3

## Sheet: Fig 1g
	age	VF	VA	VA or VF
	12
	22
	35	1	1	1*
	19	0	0	0*
	37
	50	1		1*
	59		1
	67
	25
	26	0	0	0*
	8
	25	0	0	0*
	6
	22	1	0	1*
	21	1	0	1*
	55	1	1	1*
	22	0	0	0*
	11
	16	0	0	0*
	12	0	0	0*
	30
	38
	50	0	0	0*
	27
	37
	52	0	1	0*

## Sheet:  Fig 2 a
	Intensity (cd x s/m2)		PCDH15R250X/+ 1 mth-a-wave												PCDH15R250X/R250X 1 mth-a-wave
	0.00396223
	0.00995268		48	21	28	27	26.16	30.42	44.43	18.66	82.11	32.59			15.41	12.76	17.04	31.76	31.37	10.02	12	40	16	29
	0.025		24	13	39	52	68.98	27.05	48.91	46.36	37.03	50.91			33.12	44.84	79.72	42.73	66.63	13.11	14	32	5	14
	0.0995268		34	40	87	133	41.48	99.36	71.74	48.09	110.3	57.91			88.35	90.79	56.99	20.74	117.2	87.42	40	82	23	56
	0.25		181	104	183	213	233.7	186.9	191.1	167.2	189.4	175.9			142.9	79.04	133.9	121.6	120.8	89.85	78	106	130	148
	0.627972		267	167	233	208	355.2	262.8	272.2	227.3	270	297.9			282.9	198.1	195.6	174.4	235	179.1	101	151	71	239
	1.57739		305	234	255	268	320.1	285.7	305.3	271.1	228.4	376.5			270.9	199.8	221.4	206.1	241.2	224.5	102	178	145	294
	3.14731		397	279	331	333	344.9	412.9	302.1	317.4	365.9	455.5			264.7	314.4	238	312.8	310.8	238.3	156	163	175	320
			415	329	372	343	391	502.1	391.4	265.1	438.1	463.3			329.3	304.6	317.2	373.8	338.7	216.6	163	196	196	341
	Intensity (cd x s/m2)		PCDH15R250X/+ 1 mth-b-wave												PCDH15R250X/R250X 1 mth-b-wave
	0.00396223		514.9	471.4	448.4	303.1	528.8	580.3	323	236	312	112			360.2	367.5	355.7	247	376	318	130	157	264	316
	0.00995268		537.1	510	484.5	356	532.4	699.5	274	303	345	154			397.6	423	379	276	348.9	356.8	105	193	354	333
	0.025		436.4	537.9	516.1	461	645.7	653.1	384	317	289	250			363.9	394.9	350.3	316.2	389.7	294.4	118	171	310	360
	0.0995268		667.6	634.3	531.8	414.8	690	765.5	466	376	407	354			442.2	443.9	367.3	367.8	483.7	439.5	99	275	355	462
	0.25		684	704.3	594.2	399.1	698.7	807.3	553	512	678	498			564.4	502.7	438	448.5	514.4	433.9	207	331	330	576
	0.627972		737.8	750.9	761.6	536.6	616.6	880.3	660	535	747	479			502	525.7	464.3	446.1	540.9	517.8	273	376	401	636
	1.57739		860.5	854.5	725.8	607.7	768.9	995	742	620	787	622			566.9	604.5	483.9	587.7	553.1	558.3	238	406	389	754
	3.14731		835.4	993.3	815	558.5	820.4	980	803	626	874	664			598.7	559.4	486.1	551.6	617	578.1	337	435	395	716

## Sheet: Fig 2 b
		control (Pcdh15_WT or Pcdh15_Het)	Pcdh15R250X/R250X
		225	93
		184	106
		137	83
		210	119
		186.9	127.4
		191.9	73.44
		186.6	134.9
		200.3	144
		180.1	71
		138.7	182

## Sheet: Fig 2 c
		Intensity (cd x s/m2)	control (PCDH5_WT or PCDH15_Het)										PCDH15R250X/R250X
		0.001	14	4	29	2	22	18	14				2	29	2	7	16
		0.00396223	7	43	2	10	16	12	32				34	47	14	5	35
		0.00995268	29	55	3	23	32	13	27				5	39	57	4	52
		0.025	10	51	13	62	37	47	28				55	30	65	37	167
		0.0995268	109	151	19	141	105	92	47				123	121	116	55	231
		0.25	126	176	143	231	109	130	106				212	130	209	89	145
		0.627972	204	348	203	285	236	224	205				297	207	219	95	361
		1.57739	272	393	289	334	283	293	350				363	233	263	121	394
		3.14731	333	441	295	338	349	364	347				402	279	313	154	381
		Intensity (cd x s/m2)	control (PCDH5_WT or PCDH15_Het)										PCDH15R250X/R250X
		0.001	245	224	278	295	270	235	131				358	222	185	214	307
		0.00396223	268	285	376	366	474	336	295				462	306	228	342	223
		0.00995268	435	311	439	373	431	256	428				430	343	321	276	265
		0.025	501	373	461	403	509	369	465				248	342	212	306	228
		0.0995268	558	374	429	406	501	366	514				317	360	274	259	292
		0.25	555	483	631	484	667	449	566				272	407	311	265	248
		0.627972	586	448	681	557	661	463	648				381	441	292	284	336
		1.57739	571	480	755	533	787	509	650				422	472	351	267	310
		3.14731	613	528	770	591	767	562	808				435	484	409	358	364

## Sheet: Fig 2d
		control (Pcdh15_WT or Pcdh15_Het)	Pcdh15R250X/R250X
		178	143
		171	116
		210	96
		262	91
		163	98
		164
		228

## Sheet: Fig 2 e
		Intensity (cd x s/m2)	control (Pcdh15_WT or Pcdh15_Het)										Pcdh15R250X/R250X: baseline
		0.001	8.253	26.13	91.26	1.96	22	29.42	10.89				10.43	12.36	4.797	8.416	3.434
		0.00396223	60.45	26.5	11.26	10.13	16.27	25.92	2.373				30.35	20.74	13.69	18.41	8.851
		0.00995268	54.24	19.14	13.09	22.6	41.1	14.86	38.8				9.511	61.4	10.09	6.98	8.41
		0.025	26.18	17.93	46.62	61.41	61.77	76	41				42.88	27.19	36.28	95.94	34.27
		0.0995268	152.1	27.65	115.7	164.9	135	98	147.3				44.2	64.59	72.1	54.29	64.22
		0.25	151.3	55.73	129.2	220	151.7	114.5	147.6				88.04	82.03	103.4	112.3	111.9
		0.627972	324.5	150.4	248.2	260.9	268	210.8	246.3				62.57	107.6	157	113.4	105.2
		1.57739	381.5	243.9	305.7	309.9	361.1	346.8	295.2				105.6	69.03	151.6	87.35	149.9
		3.14731	381.5	307	358.9	314.6	375.1	299.8	363.9				158	194	208.1	159.5	133.9
		Intensity (cd x s/m2)	control (Pcdh15_WT or Pcdh15_Het): vehicle injected										Pcdh15R250X/R250X baseline
		0.001	465.5	196.9	131.9	102.6	283.6	197.4	344.4				240.3	243.6	230.4	283.4	213
		0.00396223	487.8	230.7	275	175.3	528.9	460.3	531				265.7	298.4	335.3	313.4	267
		0.00995268	489.8	350.3	428.3	251.7	487.7	626.5	452.1				258.3	330.5	312.7	215.9	285
		0.025	529.9	606.1	465.5	241.9	517.4	456.1	488.8				252.8	310.4	225.8	279	298
		0.0995268	460.2	625.1	482.7	420.2	526.4	538.1	557.4				264.3	308.1	362.5	341.8	328
		0.25	569.1	580.1	566.4	505.3	592	514.3	605.5				230.3	406.3	446.1	387.8	480
		0.627972	652.8	630	609.3	470.6	566	594.9	563.6				290.7	431.5	385.3	360.9	497
		1.57739	778.5	695.6	625.7	579.8	746.6	674.7	687.1				345.4	477	515.1	368.6	475
		3.14731	805.2	702.9	808.1	700	781.9	758.3	745.7				309.1	494.3	470.2	423.7	528

## Sheet: Fig 2f
				control	Pcdh15R250X/R250X
				201	126
				171	116
				178	73
				189	118
				229	119
				163
				222

## Sheet: Fig 2g
			Intensity (cd x s/m2)	control (Pcdh15_WT ) a- wave										Pcdh15R250X - b-wave
			0.001		2.68	2.99	3.42	6.19	36.91						56.77	32.62	3.37	11.82	18.93
			0.00396223		17.84	66.69	2.88	29.19	1.35						23.29	84.32	11.18	14.2	9.94
			0.00995268		26.36	36.5	37.74	34.91	91.58						52.03	43.67	14.85	20.1	18.05
			0.025		65.93	61.43	139.9	58.85	112.7						50.76	128.5	26.97	15.65	21.92
			0.0995268		125.2	140.9	74.36	137.3	164.3						63.51	27.28	53.16	30.23	26.29
			0.25		143.2	137.7	177.6	172.1	195.1						132.5	73.02	96.31	52.26	56.64
			0.627972		88	243.5	136	169.2	176.4						87.04	104.2	115.6	113.8	38.52
			1.57739		156.9	237.8	176.4	204.5	231						165.3	120.5	156.7	101.9	73.04
			3.14731		182	331.8	211.2	268.4	266.7						133.2	98.62	173.2	108.1	79.63
			Intensity (cd x s/m2)	control (Pcdh15_WT ) a- wave										Pcdh15R250X - b-wave
			0.001		222.4	330.5	213.8	303	275.4						233.4	171.2	132.7	86.16	9.17
			0.00396223		179	375.2	313.7	283	387.9						163	215.9	132.7	95.48	113.8
			0.00995268		185.5	306.1	252.7	332.5	320.1						235.5	209.1	198	142.1	76.24
			0.025		198.4	364.4	258	289.5	336.5						210.8	286.2	196.6	154.4	106.6
			0.0995268		294.1	429.6	333.6	260.8	337.7						264.1	251.8	201.3	175.4	124.5
			0.25		229.1	422.2	272.4	314.7	376.6						324.5	206.4	223.7	218.6	162.5
			0.627972		224.3	502.2	337.5	314.1	365.1						276.4	254.2	272.6	214.6	180.7
			1.57739		281.4	492.6	360.4	371.7	454.8						304.6	328.9	383	205.6	187.9
			3.14731		244.2	598.2	490.3	466.5	451.1						299.1	301.8	377.6	220.7	168.1

[truncated: 22 more sheets: Fig 2h, Fig 2j, Fig 3b, Fig 3c, Fig 3d, Fig 4b, Fig 4c, Fig 4e, Fig 4f, Fig 4g, F2FS2a, F2FS2b, F2FS2c, F2FS4b, F2FS4c, F2FS4d, F3FS1c, F3FS1d, F3FS1e, F4FS1a …]
